# Supplementary material for: DCM self-trapping by the host deformation in flexible host–guest molecules
Source: Royal Society of Chemistry journal article supplement (doi:10.1039/d1ce00301a), 2021-01-01
Supplement: d1ce00301a1.pdf [file d1ce00301a1.pdf]

## Self-trapping DCM by the host deformation in flexible host-guest molecules

Le-Ping Miao, Qi Qi, Xiang-Bin Han,\* Wen Zhang\*

Jiangsu Key Laboratory for Science and Applications of Molecular Ferroelectrics and School of Chemistry and Chemical Engineering, Southeast University, Nanjing 211189, China

\* E-mail: hanxiangbin@seu.edu.cn

zhangwen@seu.edu.cn

### Experimental

**Figure S1.** Room-temperature powder X-ray diffraction of **1**·CH<sub>2</sub>Cl<sub>2</sub>, **1**·dioxane, and **1**·DMF.

**Figure S2.** Two-site disorders of  $\alpha$ -CH<sub>2</sub>Cl<sub>2</sub> and  $\beta$ -CH<sub>2</sub>Cl<sub>2</sub> molecules and one *tert*-butyl group of **1**·CH<sub>2</sub>Cl<sub>2</sub>.

**Figure S3.** Atomic contacts to the Hirshfeld surface of the [Zn<sub>2</sub>(saloph)] of crystals **1**·CH<sub>2</sub>Cl<sub>2</sub>, **1**·dioxane, and **1**·DMF.

**Figure S4.** Intermolecular interactions between the guest and host and Hirshfeld surface analysis together with fingerprint plots of (a) **1**·CH<sub>2</sub>Cl<sub>2</sub>, (b) **1**·dioxane, and (c) **1**·DMF at 100 K. H atoms involved in the interactions are shown in orange. The blue, white, and red regions of the surfaces correspond to negative, neutral, and positive (close contact) isoenergy, respectively.

**Figure S5** (a) The XRD pattern of the desolvated form from **1**·DMF measured with Kapton film protection (red curve) and in ambient (black curve). The re-adsorption experiment for dioxane (b) and DMF (c). The desolvate compound **1** was placed under the dioxane vapor (433 K) and DMF vapor (433 K) for 2h. After that, XRD measurement was employed to check the final component. Compound **1** can't turn back to **1**·dioxane, and it can turn back to **1**·DMF.

**Figure S6** The UV-vis diffuse reflectance spectra (a) and the excitation spectra (b) of three compounds.

**Figure S7** The calculated HOMO and LUMO for three compounds.

**Table S1.** Crystallographic data and structure refinement details for **1**·CH<sub>2</sub>Cl<sub>2</sub>, **1**·dioxane, and **1**·DMF.

**Table S2.** Selected bond lengths [Å] and angles [°] for **1**·CH<sub>2</sub>Cl<sub>2</sub> (100 K, 373 K), **1**·dioxane (100 K), and **1**·DMF (100 K).

**Table S3.** The value of natural cavities and solvent molecules occupied volume of **1·CH<sub>2</sub>Cl<sub>2</sub>**, **1·dioxane**, and **1·DMF** calculated by Platon.

## Experiment

### Materials and general characterizations.

Reagents used were in analytical grade without further purification.

Thermogravimetric analysis (TGA) was performed by an SDT-Q600 system (NETZSCH). The crystals were filtered out from the solution, and the remaining solvent was removed with tissue without any further drying treatment. And the TG test was started within one hour to avoid the solvent loss caused by experiment errors.

Powder X-ray diffraction patterns were obtained on a Rigaku SmartLab X-ray diffraction instrument. Single-crystal X-ray Diffraction was collected on a Rigaku Oxford Diffraction Supernova Dual Source, Cu at Zero equipped with an AtlasS2 CCD using Cu K $\alpha$  radiation and Rigaku Oxford Diffraction XtaLAB Synergy R, DW system equipped with an HyPix using Mo K $\alpha$  radiation. The CrysAlisPro software package was used to collect Data, refine cells, and reduce data. The SHELXL-2014 software package was used to solve the structures by direct methods and successive Fourier synthesis and full-matrix least-squares refinements on  $F^2$ . All non-hydrogen atoms were refined anisotropically.

Solid powder UV absorption spectrum was used as a UV-visible spectrophotometer (UV-2600, Shimadzu). Solid-state emission spectra were collected on a steady-state, transient fluorescence spectrometer (PluoroLog 3-TCSPC, Horiba Jobin Yvon Inc).

Time-dependent density functional theory (TD-DFT) calculations of **1-DCM**, **1·dioxane**, and **1-DMF** were performed within Gaussian09 Package<sup>2</sup>. A single molecular unit with solvent was extracted and calculated their absorption properties using the TD -B3LYP/6-31G\* method.

**Synthesis.** The synthesis of Zn(saloph) was reported in the procedure.<sup>1</sup> Red block crystals of **1·CH<sub>2</sub>Cl<sub>2</sub>** were obtained by a slow evaporation of a mixed DCM-CH<sub>3</sub>CN (v:v = 10:1) solution of [Zn<sub>2</sub>(saloph)] (0.5 g, 0.88 mmol) and quinuclidine (0.2 g, 1.77 mmol), with a yield of 72% (based on quinuclidine). Compound **1·dioxane** and **1·DMF** were prepared with a similar method with a yield of 65% through DCM-dioxane (v:v = 1:1) and DCM-DMF (v:v = 1:1), respectively.

CCDC 2052505–2052510 and 2064699–2064700 contains the crystallographic data for **1·CH<sub>2</sub>Cl<sub>2</sub>**,

**1·dioxane**, and **1·DMF**. These data can be obtained free of charge via <http://www.ccdc.cam.ac.uk/conts/retrieving.html>, or from the Cambridge Crystallographic Data Centre, 12 Union Road, Cambridge CB2 1EZ, UK; fax: +44 1223-336-033; or e-mail: [deposit@ccdc.cam.ac.uk](mailto:deposit@ccdc.cam.ac.uk).

## References

1. Kleij, A. W.; Kuil, M.; Tooke, D. M.; Lutz, M.; Spek, A. L.; Reek, J. N. H. Zn<sup>II</sup>–Salphen Complexes as Versatile Building Blocks for the Construction of Supramolecular Box Assemblies. *Chem. Eur. J.* **2005**, *11*, 4743–4750.
2. Frisch, M. J.; Trucks, G. W.; Schlegel, H. B.; Scuseria, G. E.; Robb, M. A.; Cheeseman, J. R.; Scalmani, G.; Barone, V.; Petersson, G. A.; Nakatsuji, H.; Li, X.; Caricato, M.; Marenich, A. V.; Bloino, J.; Janesko, B. G.; Gomperts, R.; Mennucci, B.; Hratchian, H. P.; Ortiz, J. V.; Izmaylov, A. F.; Sonnenberg, J. L.; Williams; Ding, F.; Lipparini, F.; Egidi, F.; Goings, J.; Peng, B.; Petrone, A.; Henderson, T.; Ranasinghe, D.; Zakrzewski, V. G.; Gao, J.; Rega, N.; Zheng, G.; Liang, W.; Hada, M.; Ehara, M.; Toyota, K.; Fukuda, R.; Hasegawa, J.; Ishida, M.; Nakajima, T.; Honda, Y.; Kitao, O.; Nakai, H.; Vreven, T.; Throssell, K.; Montgomery Jr., J. A.; Peralta, J. E.; Ogliaro, F.; Bearpark, M. J.; Heyd, J. J.; Brothers, E. N.; Kudin, K. N.; Staroverov, V. N.; Keith, T. A.; Kobayashi, R.; Normand, J.; Raghavachari, K.; Rendell, A. P.; Burant, J. C.; Iyengar, S. S.; Tomasi, J.; Cossi, M.; Millam, J. M.; Klene, M.; Adamo, C.; Cammi, R.; Ochterski, J. W.; Martin, R. L.; Morokuma, K.; Farkas, O.; Foresman, J. B.; Fox, D. J. In *Gaussian 09 Rev. B.02*, Wallingford, CT, 2009.

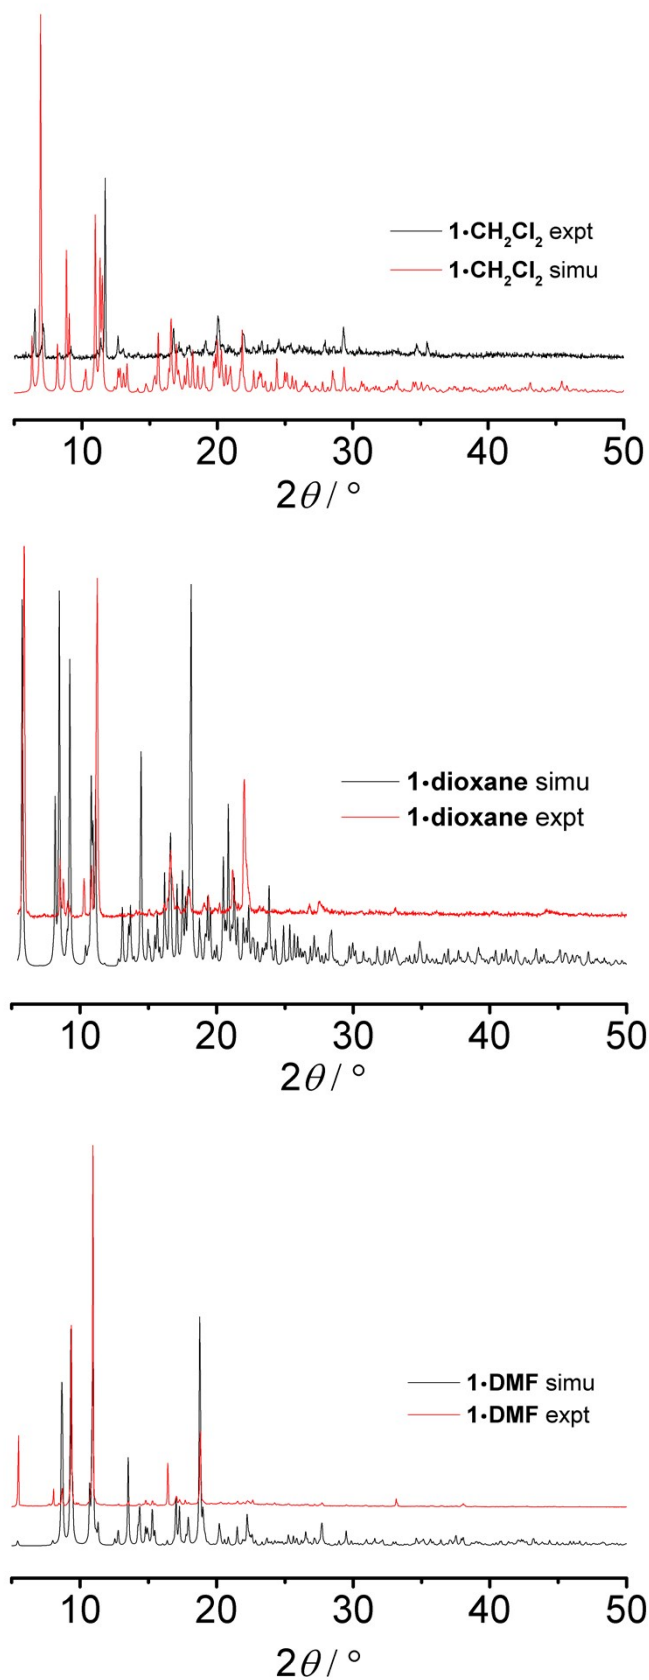

**Figure S1.** Room-temperature powder X-ray diffraction of  $1\cdot\text{CH}_2\text{Cl}_2$ ,  $1\cdot\text{dioxane}$ , and  $1\cdot\text{DMF}$ .

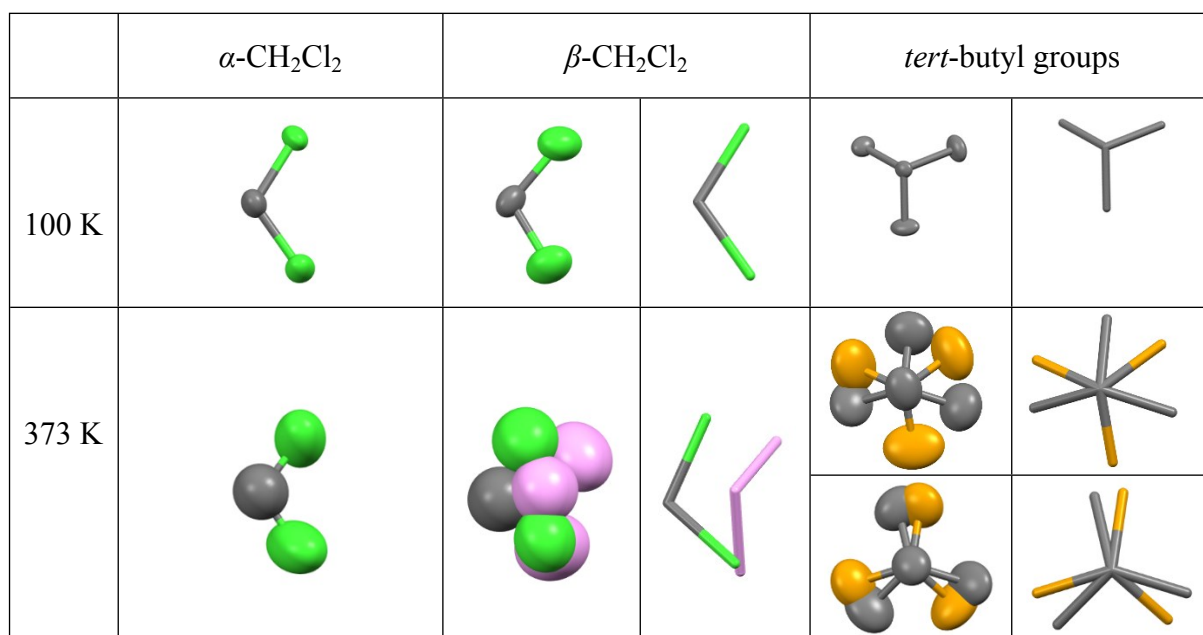

**Figure S2.** Two-site disorders of  $\alpha$ -CH<sub>2</sub>Cl<sub>2</sub> and  $\beta$ -CH<sub>2</sub>Cl<sub>2</sub> molecules and one *tert*-butyl group of **1**·CH<sub>2</sub>Cl<sub>2</sub>.

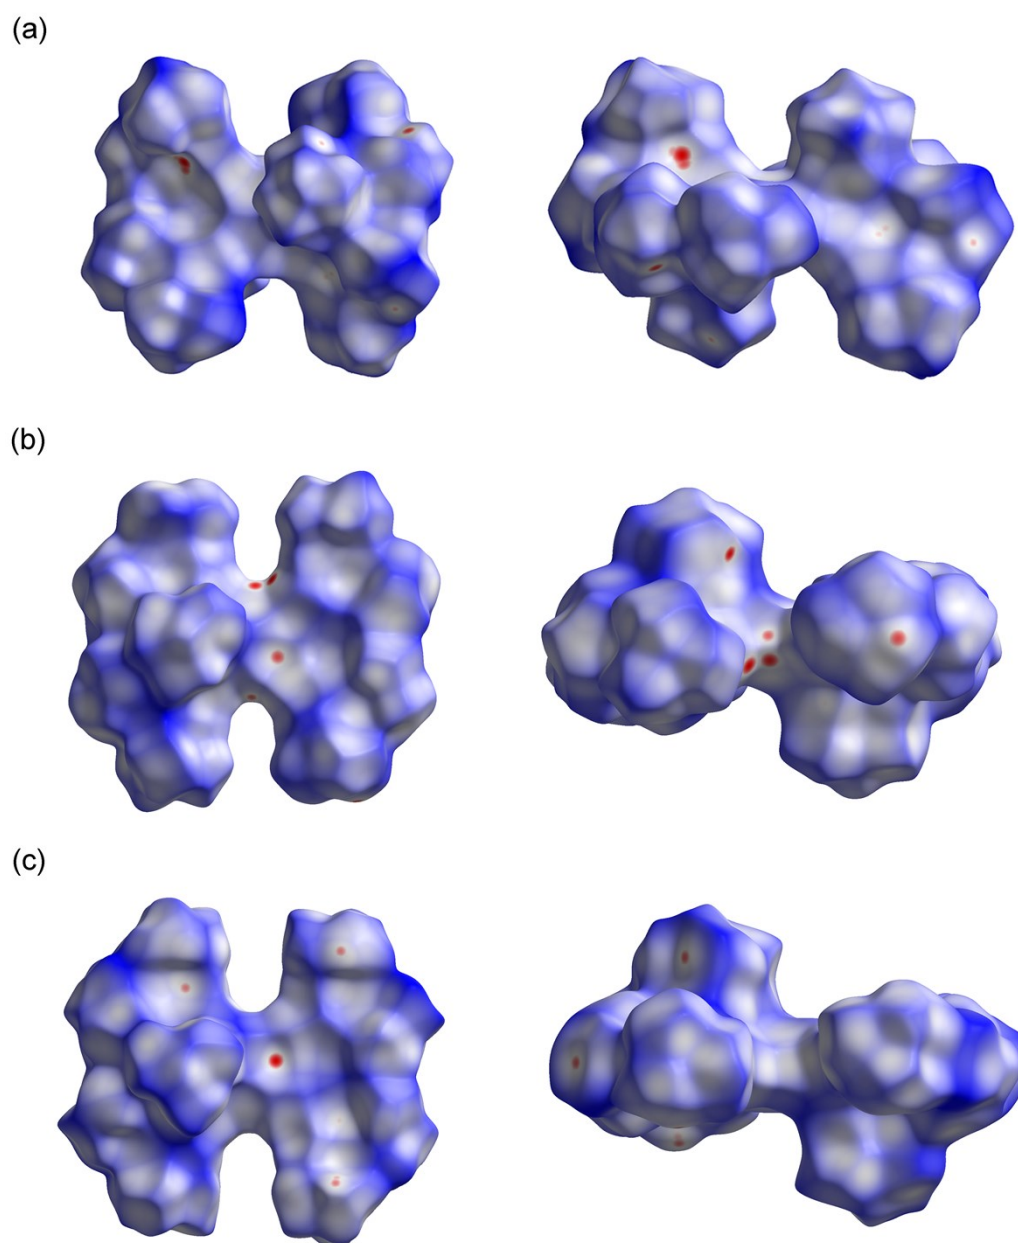

**Figure S3.** Atomic contacts to the Hirshfeld surface of the  $[\text{Zn}_2(\text{saloph})]$  of crystals  $1 \cdot \text{CH}_2\text{Cl}_2$ ,  $1 \cdot \text{dioxane}$ , and  $1 \cdot \text{DMF}$ .

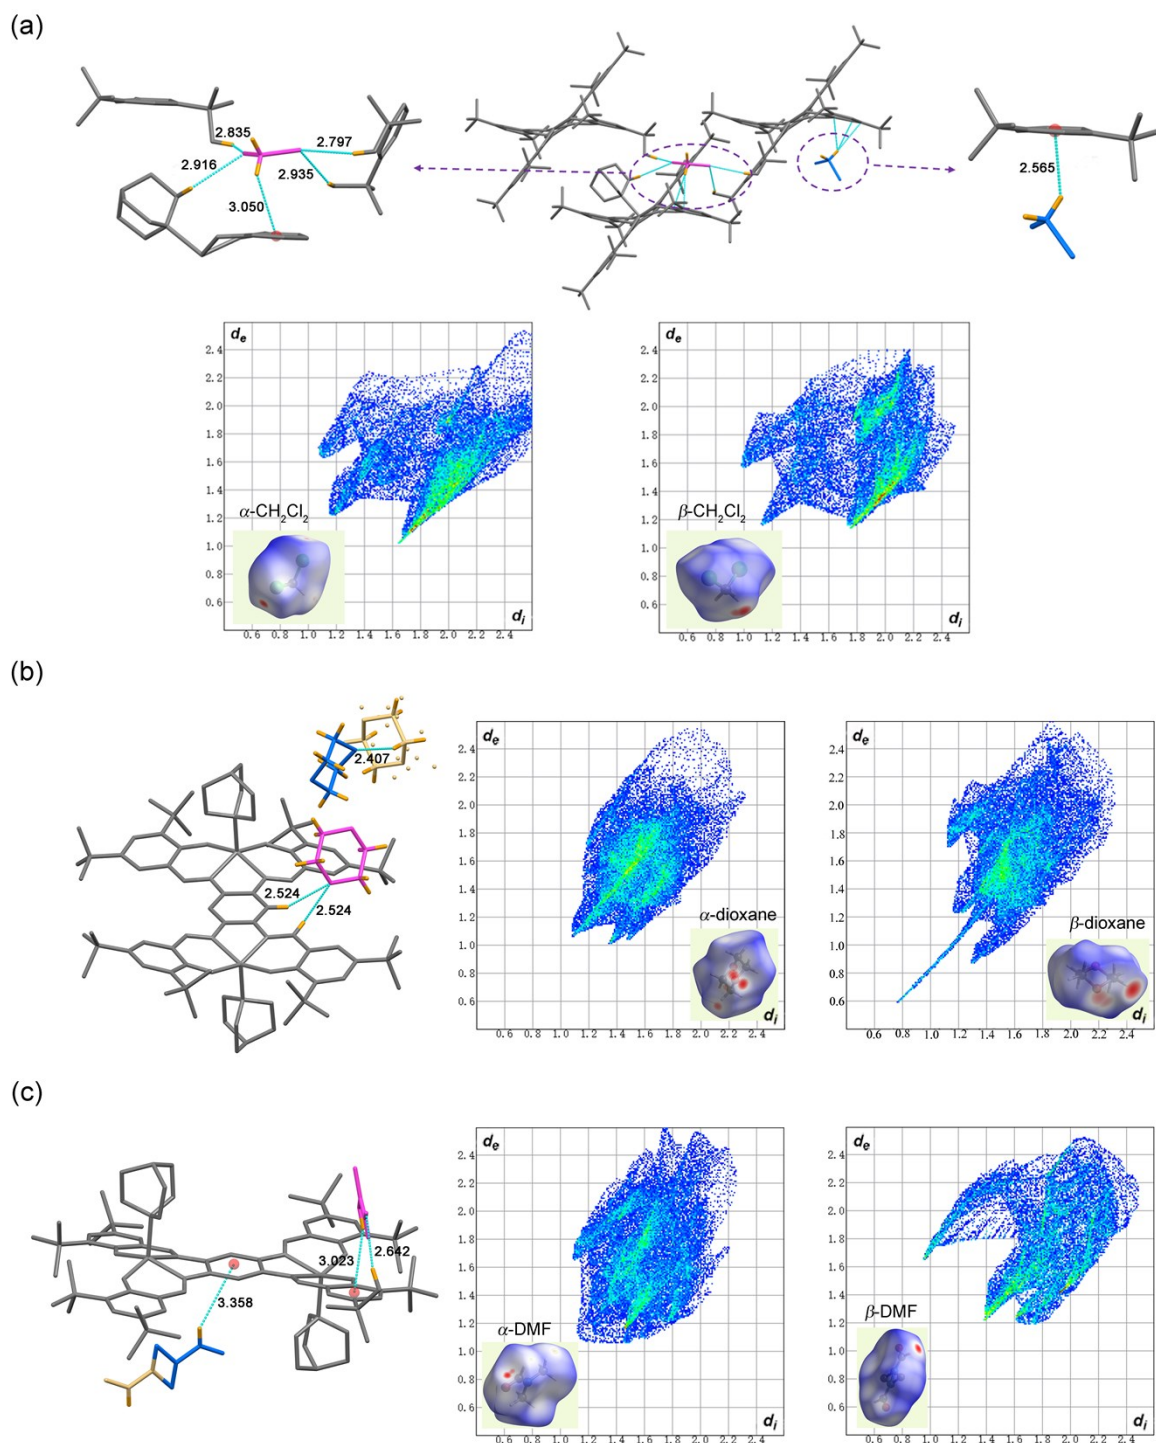

**Figure S4.** Intermolecular interactions between the guest and host and Hirshfeld surface analysis together with fingerprint plots of (a)  $1 \cdot \text{CH}_2\text{Cl}_2$ , (b)  $1 \cdot \text{dioxane}$ , and (c)  $1 \cdot \text{DMF}$  at 100 K. H atoms involved in the interactions are shown in orange. The blue, white, and red regions of the surfaces correspond to negative, neutral, and positive (close contact) isoenergy, respectively.



To understand the high thermal stability of the  $\text{CH}_2\text{Cl}_2$  solvate  $\mathbf{1}\cdot\text{CH}_2\text{Cl}_2$ , we firstly analyze the  $\text{CH}\cdots\pi$  and  $\text{CCl}\cdots\text{H}$  intermolecular interactions between the guest and host molecules 100 K by Hirshfield surface analysis (Figure S4a). Both the  $\alpha$ - and  $\beta$ - $\text{CH}_2\text{Cl}_2$  molecules are encapsulated in the voids in isolated pairs. For the  $\alpha$ - $\text{CH}_2\text{Cl}_2$ , the involved  $\text{H}\cdots\text{C}_{\text{centroid}}$  (phenyl ring) distance in the  $\text{CH}\cdots\pi$  is 3.050 Å while the  $\text{Cl}\cdots\text{H}$  distances in the halogen bonds are between 2.797 and 2.935 Å. The  $\beta$ - $\text{CH}_2\text{Cl}_2$  only has  $\text{CH}\cdots\pi$  bonds with the lengths between 2.565 Å. In  $\mathbf{1}\cdot\text{dioxane}$ , the  $\alpha$ -dioxane only have weak  $\text{CH}\cdots\text{O}$  interactions with the host molecules and  $\beta$ -dioxane 100 K (Figure S4b). The distances of the H to atoms O are 2.524, 2.524, and 2.407 Å. Furthermore, in  $\mathbf{1}\cdot\text{DMF}$ , The  $\text{O}\cdots\text{H}$  distance in the  $\text{CH}\cdots\text{O}$  hydrogen bonds is 2.642 Å. The  $\alpha$ -DMF and  $\beta$ -DMF have weak  $\text{CH}\cdots\pi$  bonds with the  $\text{H}\cdots\text{C}_{\text{centroid}}$  distances of 3.358 and 3.023 Å (Figure S4c). Comparing to  $\mathbf{1}\cdot\text{DMF}$ , the guests of  $\mathbf{1}\cdot\text{CH}_2\text{Cl}_2$  show more red regions, revealing more closer contacts, and fingerprint plots validate this result (Figure S4a, S4c). The maximal surface of red regions and the sharp fingerprint plot of  $\beta$ -dioxane in  $\mathbf{1}\cdot\text{dioxane}$  indicate seemingly stronger intermolecular interactions. While it is an illusion caused by calculation results. Since the interplay is between the  $\beta$ -dioxane and  $\gamma$ -dioxane which are closely packing not the  $\beta$ -dioxane guest and the host-plate. These results reflect the different cavity environments of the confined three types of guest molecules. All them show weak interaction between the host molecule and the guest solvent molecules.

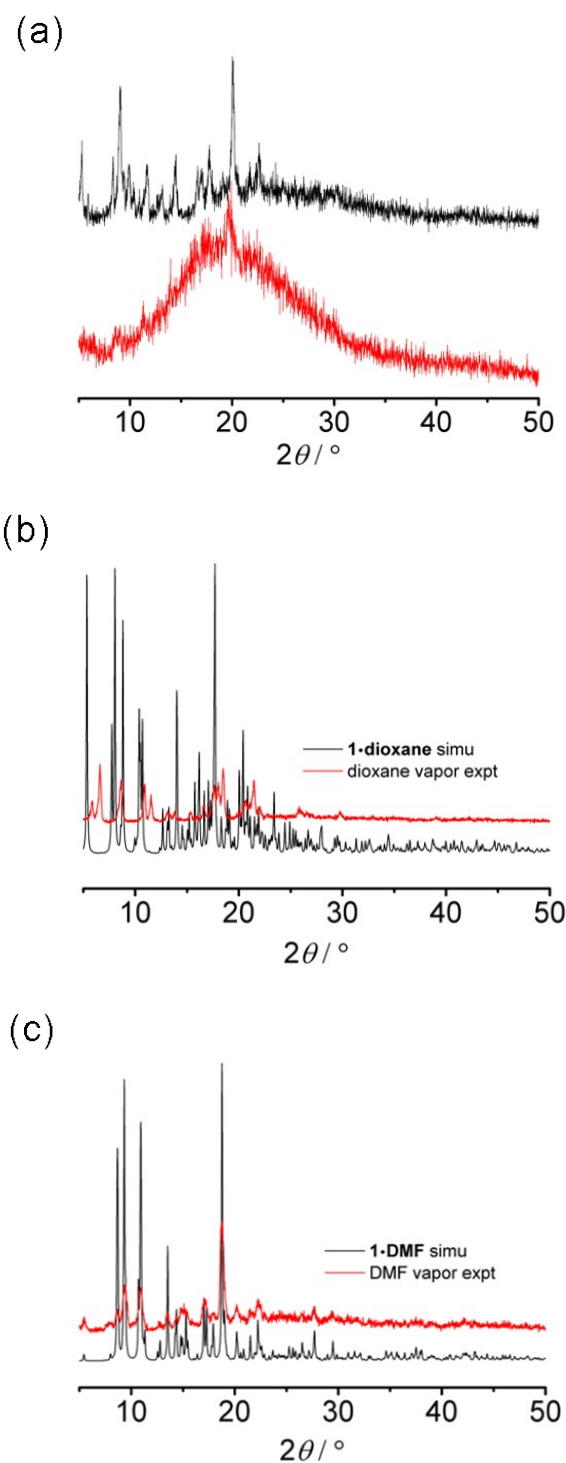

**Figure S5** (a) The XRD pattern of the desolvated form from **1·DMF** measured with Kapton film protection (red curve) and in ambient (black curve). The re-adsorption experiment for dioxane (b) and DMF (c). The desolvate compound **1** was placed under the dioxane vapor (433 K) and DMF vapor (433 K) for 2h. After that, XRD measurement was employed to check the final component. Compound **1** can't turn back to **1·dioxane**, and it can turn back to **1·DMF**.

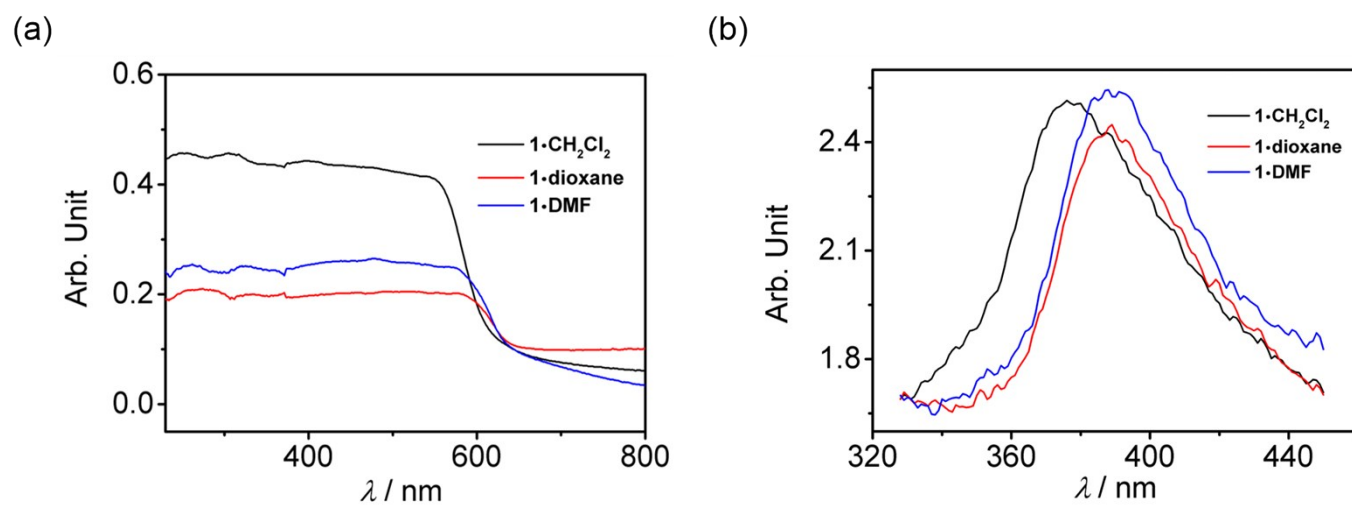

**Figure S6** The UV-vis diffuse reflectance spectra (a) and the excitation spectra (b) of three compounds.

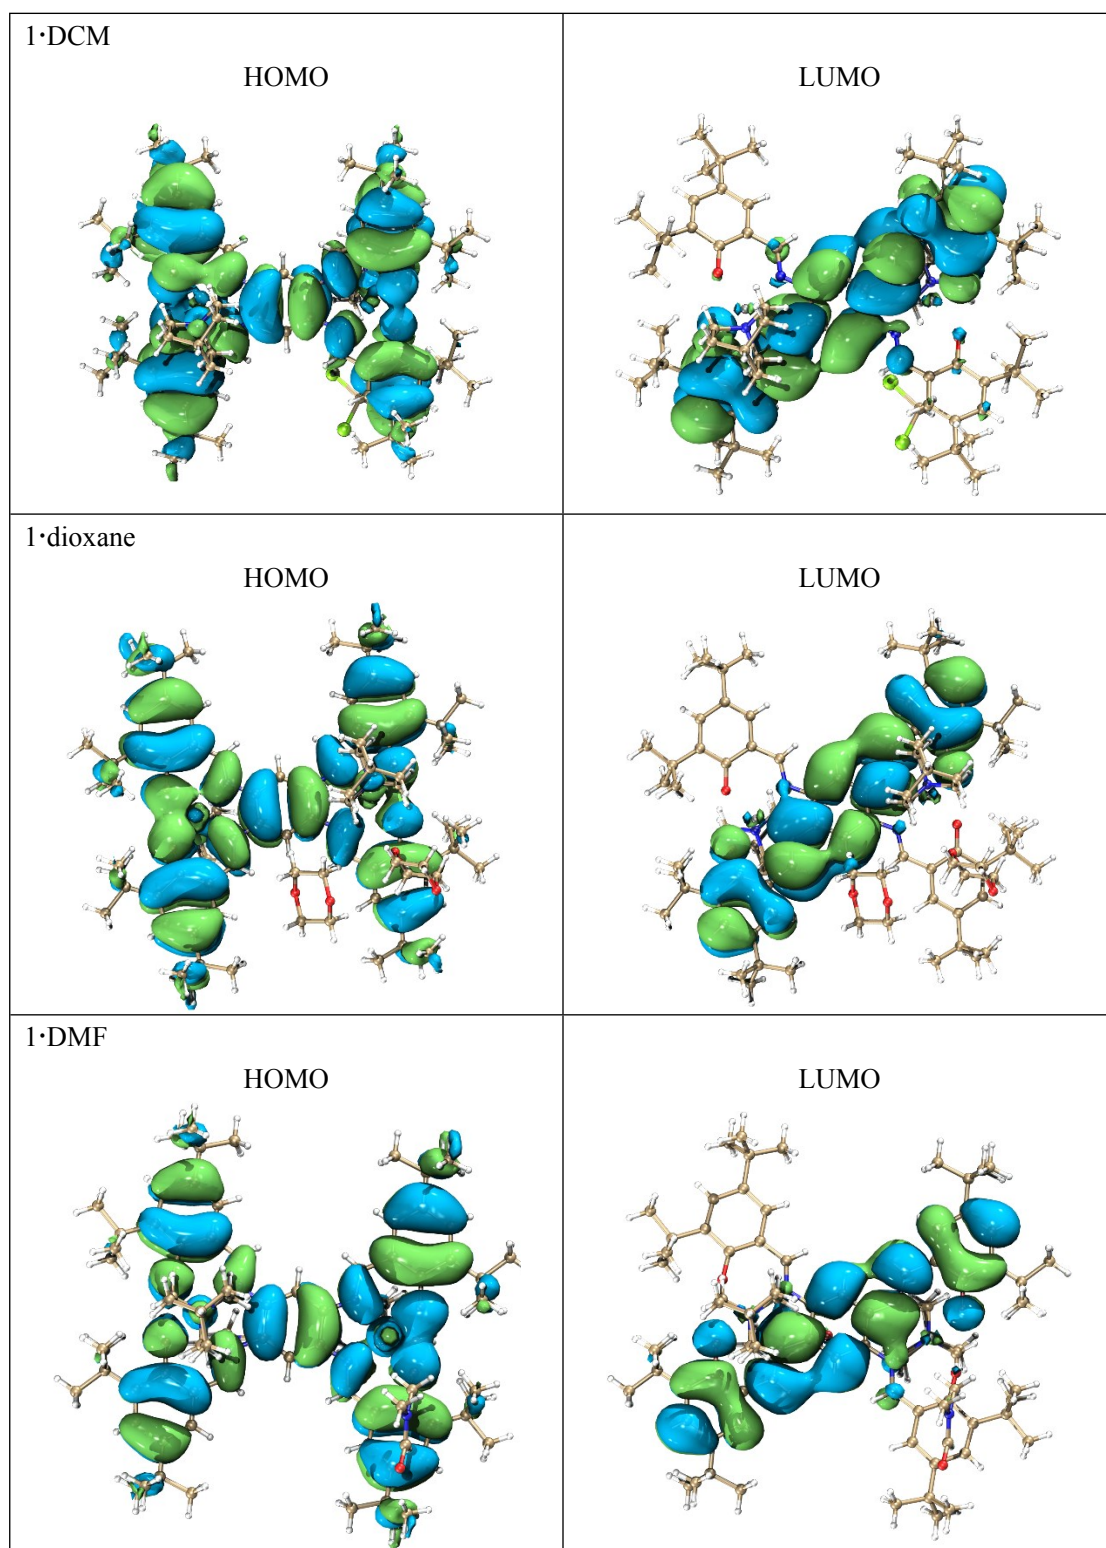

**Figure S7** The calculated HOMO and HOMO for three compounds.

**Table S1.** Crystallographic data and structure refinement details for **1·CH<sub>2</sub>Cl<sub>2</sub>**, **1·dioxane**, and **1·DMF**.

| <b>1·CH<sub>2</sub>Cl<sub>2</sub></b>                         | 100 K                                                                                          | 153 K                                                                                          | 253 K                                                                                          | 293 K                                                                                          |
|---------------------------------------------------------------|------------------------------------------------------------------------------------------------|------------------------------------------------------------------------------------------------|------------------------------------------------------------------------------------------------|------------------------------------------------------------------------------------------------|
| formula                                                       | C <sub>84</sub> H <sub>120</sub> N <sub>6</sub> O <sub>4</sub> Zn <sub>2</sub> Cl <sub>8</sub> | C <sub>84</sub> H <sub>120</sub> N <sub>6</sub> O <sub>4</sub> Zn <sub>2</sub> Cl <sub>8</sub> | C <sub>84</sub> H <sub>120</sub> N <sub>6</sub> O <sub>4</sub> Zn <sub>2</sub> Cl <sub>8</sub> | C <sub>84</sub> H <sub>120</sub> N <sub>6</sub> O <sub>4</sub> Zn <sub>2</sub> Cl <sub>8</sub> |
| $M_w$                                                         | 1692.24                                                                                        | 1692.24                                                                                        | 1692.24                                                                                        | 1692.24                                                                                        |
| Crystal system                                                | Monoclinic                                                                                     | Monoclinic                                                                                     | Monoclinic                                                                                     | Monoclinic                                                                                     |
| space group                                                   | $P2_1/n$                                                                                       | $P2_1/n$                                                                                       | $P2_1/n$                                                                                       | $P2_1/n$                                                                                       |
| diffraction source                                            | Mo K $\alpha$                                                                                  | Mo K $\alpha$                                                                                  | Mo K $\alpha$                                                                                  | Mo K $\alpha$                                                                                  |
| wavelength [nm]                                               | 0.71073                                                                                        | 0.71073                                                                                        | 0.71073                                                                                        | 0.71073                                                                                        |
| $a$ [Å]                                                       | 11.0806(2)                                                                                     | 11.0967(2)                                                                                     | 11.1134(2)                                                                                     | 11.1207(3)                                                                                     |
| $b$ [Å]                                                       | 14.0971(3)                                                                                     | 14.1310(3)                                                                                     | 14.2035(3)                                                                                     | 14.2524(3)                                                                                     |
| $c$ [Å]                                                       | 27.4716(6)                                                                                     | 27.5930(6)                                                                                     | 28.0547(7)                                                                                     | 28.2337(7)                                                                                     |
| $\alpha$ [°]                                                  | 90                                                                                             | 90                                                                                             | 90                                                                                             | 90                                                                                             |
| $\beta$ [°]                                                   | 96.807(2)                                                                                      | 97.044(2)                                                                                      | 98.077(2)                                                                                      | 98.503(2)                                                                                      |
| $\gamma$ [°]                                                  | 90                                                                                             | 90                                                                                             | 90                                                                                             | 90                                                                                             |
| $V$ [Å <sup>3</sup> ]                                         | 4260.93(15)                                                                                    | 4294.13(15)                                                                                    | 4384.48(17)                                                                                    | 4425.76(19)                                                                                    |
| $Z$                                                           | 2                                                                                              | 2                                                                                              | 2                                                                                              | 2                                                                                              |
| $\rho_{\text{calcd}}$ [g cm <sup>-3</sup> ]                   | 1.319                                                                                          | 1.309                                                                                          | 1.282                                                                                          | 1.270                                                                                          |
| $\mu$ [mm <sup>-1</sup> ]                                     | 0.865                                                                                          | 0.858                                                                                          | 0.841                                                                                          | 0.833                                                                                          |
| total reflns                                                  | 45339                                                                                          | 47513                                                                                          | 43810                                                                                          | 47105                                                                                          |
| obsd reflns ( $I > 2\sigma(I)$ )                              | 12925                                                                                          | 13072                                                                                          | 13265                                                                                          | 13332                                                                                          |
| $R_{\text{int}}$                                              | 0.0385                                                                                         | 0.0361                                                                                         | 0.1270                                                                                         | 0.0406                                                                                         |
| $R_1^{\text{[a]}}$ , $wR_2^{\text{[b]}}$ ( $I > 2\sigma(I)$ ) | 0.0806, 0.2378                                                                                 | 0.0775, 0.2290                                                                                 | 0.0830, 0.2268                                                                                 | 0.0635, 0.1919                                                                                 |
| $R_1^{\text{[a]}}$ , $wR_2^{\text{[b]}}$ (all data)           | 0.0954, 0.2496                                                                                 | 0.0953, 0.2421                                                                                 | 0.1100, 0.2477                                                                                 | 0.0980, 0.2144                                                                                 |
| GOF ( $F^2$ )                                                 | 1.045                                                                                          | 1.036                                                                                          | 1.046                                                                                          | 1.048                                                                                          |
| $\Delta\rho^{\text{[c]}}$ [e Å <sup>-3</sup> ]                | 3.062 / -2.410                                                                                 | 2.063 / -2.030                                                                                 | 1.065 / -1.780                                                                                 | 0.741 / -0.728                                                                                 |

| <b>1·CH<sub>2</sub>Cl<sub>2</sub></b>                         | 333 K                                                                                          | 373 K                                                                                          |
|---------------------------------------------------------------|------------------------------------------------------------------------------------------------|------------------------------------------------------------------------------------------------|
| formula                                                       | C <sub>84</sub> H <sub>120</sub> N <sub>6</sub> O <sub>4</sub> Zn <sub>2</sub> Cl <sub>8</sub> | C <sub>84</sub> H <sub>120</sub> N <sub>6</sub> O <sub>4</sub> Zn <sub>2</sub> Cl <sub>8</sub> |
| $M_w$                                                         | 1692.24                                                                                        | 1692.24                                                                                        |
| Crystal system                                                | Monoclinic                                                                                     | Monoclinic                                                                                     |
| space group                                                   | <i>P2<sub>1</sub>/n</i>                                                                        | <i>P2<sub>1</sub>/n</i>                                                                        |
| diffraction source                                            | Mo K $\alpha$                                                                                  | Mo K $\alpha$                                                                                  |
| wavelength [nm]                                               | 0.71073                                                                                        | 0.71073                                                                                        |
| $a$ [Å]                                                       | 11.1435(3)                                                                                     | 11.1720(3)                                                                                     |
| $b$ [Å]                                                       | 14.3229(4)                                                                                     | 14.4058(3)                                                                                     |
| $c$ [Å]                                                       | 28.3951(9)                                                                                     | 28.4891(8)                                                                                     |
| $\alpha$ [°]                                                  | 90                                                                                             | 90                                                                                             |
| $\beta$ [°]                                                   | 98.853(3)                                                                                      | 99.187(2)                                                                                      |
| $\gamma$ [°]                                                  | 90                                                                                             | 90                                                                                             |
| $V$ [Å <sup>3</sup> ]                                         | 4478.1(2)                                                                                      | 4526.3(2)                                                                                      |
| $Z$                                                           | 2                                                                                              | 2                                                                                              |
| $\rho_{\text{calcd}}$ [g cm <sup>-3</sup> ]                   | 1.255                                                                                          | 1.242                                                                                          |
| $\mu$ [mm <sup>-1</sup> ]                                     | 0.823                                                                                          | 0.814                                                                                          |
| total reflns                                                  | 47289                                                                                          | 43829                                                                                          |
| obsd reflns ( $I > 2\sigma(I)$ )                              | 13457                                                                                          | 13718                                                                                          |
| $R_{\text{int}}$                                              | 0.0438                                                                                         | 0.0383                                                                                         |
| $R_1^{\text{[a]}}$ , $wR_2^{\text{[b]}}$ ( $I > 2\sigma(I)$ ) | 0.0648, 0.1934                                                                                 | 0.07752, 0.2266                                                                                |
| $R_1^{\text{[a]}}$ , $wR_2^{\text{[b]}}$ (all data)           | 0.1092, 0.2210                                                                                 | 0.1224, 0.2553                                                                                 |
| GOF ( $F^2$ )                                                 | 1.018                                                                                          | 1.024                                                                                          |
| $\Delta\rho^{\text{[c]}}$ [e Å <sup>-3</sup> ]                | 0.561 / -0.726                                                                                 | 0.658 / -0.667                                                                                 |

|                                                               | <b>1·dioxane</b> 100 K                                                           | <b>1·DMF</b> 100 K                                                             |
|---------------------------------------------------------------|----------------------------------------------------------------------------------|--------------------------------------------------------------------------------|
| formula                                                       | C <sub>104</sub> H <sub>160</sub> N <sub>6</sub> O <sub>16</sub> Zn <sub>2</sub> | C <sub>89</sub> H <sub>133</sub> N <sub>9</sub> O <sub>7</sub> Zn <sub>2</sub> |
| $M_w$                                                         | 1881.16                                                                          | 1571.83                                                                        |
| Crystal system                                                | Monoclinic                                                                       | Triclinic                                                                      |
| space group                                                   | $P2_1/c$                                                                         | $P\bar{1}$                                                                     |
| diffraction source                                            | Mo K $\alpha$                                                                    | Cu K $\alpha$                                                                  |
| wavelength [nm]                                               | 0.71073                                                                          | 1.54184                                                                        |
| $a$ [Å]                                                       | 17.1238(6)                                                                       | 11.3185(5)                                                                     |
| $b$ [Å]                                                       | 13.0894(4)                                                                       | 13.0309(5)                                                                     |
| $c$ [Å]                                                       | 24.1334(9)                                                                       | 17.5656(6)                                                                     |
| $\alpha$ [°]                                                  | 90                                                                               | 110.595(4)                                                                     |
| $\beta$ [°]                                                   | 105.365(4)                                                                       | 90.679(3)                                                                      |
| $\gamma$ [°]                                                  | 90                                                                               | 115.103(4)                                                                     |
| $V$ [Å <sup>3</sup> ]                                         | 5215.9(3)                                                                        | 2156.09(17)                                                                    |
| $Z$                                                           | 2                                                                                | 1                                                                              |
| $\rho_{\text{calcd}}$ [g cm <sup>-3</sup> ]                   | 1.198                                                                            | 1.206                                                                          |
| $\mu$ [mm <sup>-1</sup> ]                                     | 0.524                                                                            | 1.129                                                                          |
| total reflns                                                  | 49278                                                                            | 16185                                                                          |
| obsd reflns ( $I > 2\sigma(I)$ )                              | 15713                                                                            | 8763                                                                           |
| $R_{\text{int}}$                                              | 0.0656                                                                           | 0.0250                                                                         |
| $R_1^{[\text{a}]}$ , $wR_2^{[\text{b}]}$ ( $I > 2\sigma(I)$ ) | 0.0987, 0.2915                                                                   | 0.0392, 0.1067                                                                 |
| $R_1^{[\text{a}]}$ , $wR_2^{[\text{b}]}$ (all data)           | 0.1601, 0.3384                                                                   | 0.0421, 0.1090                                                                 |
| GOF ( $F^2$ )                                                 | 1.048                                                                            | 1.074                                                                          |
| $\Delta\rho^{[\text{c}]}$ [e Å <sup>-3</sup> ]                | 1.272 / -0.813                                                                   | 0.812 / -0.578                                                                 |

<sup>[a]</sup>  $R_1 = \Sigma ||F_o| - |F_c|| / |F_o|$ . <sup>[b]</sup>  $wR_2 = [\Sigma w(F_o^2 - F_c^2)^2] / \Sigma w(F_o^2)^2]^{1/2}$ . <sup>[c]</sup> Maximum and minimum residual electron density.

**Table S2.** Selected bond lengths [ $\text{\AA}$ ] and angles [ $^\circ$ ] for **1**·**CH<sub>2</sub>Cl<sub>2</sub>** (100 K, 373 K), **1**·**dioxane** (100 K), and **1**·**DMF** (100 K).

| <b>1</b> · <b>CH<sub>2</sub>Cl<sub>2</sub></b> (100 K) |          |                                      |             |
|--------------------------------------------------------|----------|--------------------------------------|-------------|
| N1–Zn1                                                 | 2.111(3) | O1–Zn1–O2 <sup>i</sup>               | 100.92 (11) |
| N2–Zn1 <sup>i</sup>                                    | 2.100(3) | O1–Zn1–N2 <sup>i</sup>               | 146.74 (12) |
| N3–Zn1                                                 | 2.103(3) | O2 <sup>i</sup> –Zn1–N2 <sup>i</sup> | 84.98 (11)  |
| O1–Zn1                                                 | 1.956(3) | O1–Zn1–N3                            | 102.44 (13) |
| O2–Zn1 <sup>i</sup>                                    | 2.005(3) | O2 <sup>i</sup> –Zn1–N3              | 98.45 (12)  |
| Zn1–O2 <sup>i</sup>                                    | 2.005(3) | N2 <sup>i</sup> –Zn1–N3              | 109.07 (12) |
| Zn1–N2 <sup>i</sup>                                    | 2.100(3) | O1–Zn1–N1                            | 88.63 (12)  |
|                                                        |          | O2 <sup>i</sup> –Zn1–N1              | 157.71 (12) |
|                                                        |          | N3–Zn1–N1                            | 76.34 (12)  |
|                                                        |          | N1–Zn1–N2                            | 99.08 (12)  |
| <b>1</b> · <b>CH<sub>2</sub>Cl<sub>2</sub></b> (373 K) |          |                                      |             |
| N1–Zn1                                                 | 2.127(3) | O1–Zn1–O2 <sup>i</sup>               | 101.64(10)  |
| N2–Zn1 <sup>i</sup>                                    | 2.117(3) | O1–Zn1–N3                            | 102.25(11)  |
| N3–Zn1                                                 | 2.112(3) | O2 <sup>i</sup> –Zn1–N3              | 98.85(11)   |
| O1–Zn1                                                 | 1.953(2) | O1–Zn1–N2 <sup>i</sup>               | 144.77(11)  |
| O2–Zn1 <sup>i</sup>                                    | 1.992(2) | O2 <sup>i</sup> –Zn1–N2 <sup>i</sup> | 84.55(9)    |
| Zn1–O2 <sup>i</sup>                                    | 1.992(2) | N3–Zn1–N2 <sup>i</sup>               | 111.09(11)  |
| Zn1–N2                                                 | 2.117(3) | O1–Zn1–N1                            | 87.40(10)   |
|                                                        |          | O2 <sup>i</sup> –Zn1–N1              | 156.06(10)  |
|                                                        |          | N3–Zn1–N1                            | 100.81(11)  |
|                                                        |          | N2 <sup>i</sup> –Zn1–N1              | 75.73(10)   |
| <b>1</b> · <b>dioxane</b> (100 K)                      |          |                                      |             |
| N1–Zn1                                                 | 2.111(4) | O1–Zn1–O2 <sup>i</sup>               | 92.95(16)   |
| N2–Zn1 <sup>i</sup>                                    | 2.077(4) | O1–Zn1–N2 <sup>i</sup>               | 152.22(17)  |
| N3–Zn1                                                 | 2.106(5) | O2 <sup>i</sup> –Zn1–N2 <sup>i</sup> | 88.99(16)   |
| O1–Zn1                                                 | 1.939(4) | O1–Zn1–N3                            | 105.57(19)  |



---

|                      |            |                         |            |
|----------------------|------------|-------------------------|------------|
| O2-Zn1 <sup>i</sup>  | 1.963(4)   | O2 <sup>i</sup> -Zn1-N3 | 101.6(2)   |
| Zn1-O2 <sup>i</sup>  | 1.963(4)   | N2 <sup>i</sup> -Zn1-N3 | 101.15(18) |
| Zn1-N2 <sup>i</sup>  | 2.077(4)   | O1-Zn1-N1               | 87.80(15)  |
|                      |            | O2 <sup>i</sup> -Zn1-N1 | 153.24(18) |
|                      |            | N2 <sup>i</sup> -Zn1-N1 | 78.44(16)  |
|                      |            | N3-Zn1-N1               | 103.94(19) |
| <b>1·DMF (100 K)</b> |            |                         |            |
| N1-Zn1               | 2.1077(15) | O1-Zn1-O2               | 92.34(5)   |
| N2-Zn1               | 2.0756(15) | O1-Zn1-N2               | 151.12(6)  |
| N3-Zn1               | 2.1268(15) | O2-Zn1-N2               | 89.16(5)   |
| O1-Zn1               | 1.9540(13) | O1-Zn1-N1               | 87.80(5)   |
| O2-Zn1               | 1.9717(12) | O2-Zn1-N1               | 154.38(6)  |
|                      |            | N2-Zn1-N1               | 78.81(6)   |
|                      |            | O1-Zn1-N3               | 103.07(6)  |
|                      |            | O2-Zn1-N3               | 103.73(6)  |
|                      |            | N2-Zn1-N3               | 104.57(6)  |
|                      |            | N1-Zn1-N3               | 101.18(6)  |

---

**Table S3.** The value of natural cavities and solvent molecules occupied volume of **1·CH<sub>2</sub>Cl<sub>2</sub>**, **1·dioxane**, and **1·DMF** calculated by Platon.

|                                       |                                           | Volume /<br>Å <sup>3</sup> | total unit cell volume / Å <sup>3</sup> |
|---------------------------------------|-------------------------------------------|----------------------------|-----------------------------------------|
| <b>1·CH<sub>2</sub>Cl<sub>2</sub></b> | Natural cavities                          | 128.9                      | 4260.9                                  |
|                                       | <i>α</i> -CH <sub>2</sub> Cl <sub>2</sub> | 254.8                      |                                         |
|                                       | <i>β</i> -CH <sub>2</sub> Cl <sub>2</sub> | 236.9                      |                                         |
|                                       | Total cavities                            | 491.7                      |                                         |
| <b>1·dioxane</b>                      | Natural cavities                          | 79.1                       | 5215.9                                  |
|                                       | Total cavities                            | 2082.1                     |                                         |
| <b>1·DMF</b>                          | Natural cavities                          | 19.9                       | 2156.1                                  |
|                                       | Total cavities                            | 463.3                      | 2156.1                                  |
